# Supplementary material
Source: PubMed Central journal article supplement (PMC4357935)
Supplement: AEM.04020-14_zam999116127so1.pdf [file AEM.04020-14_zam999116127so1.pdf]

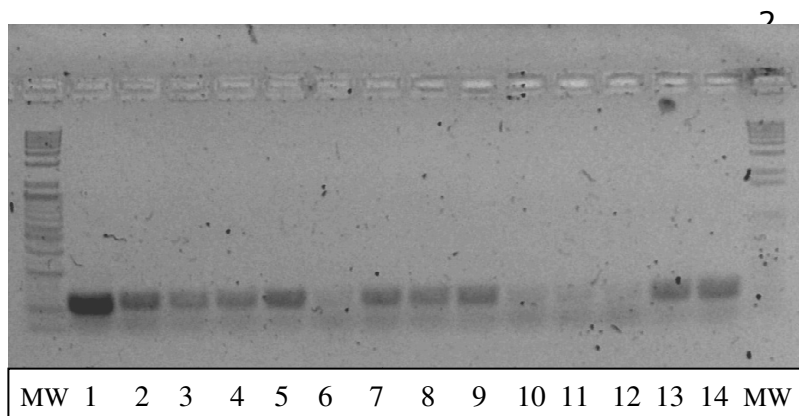

15 Supplementary Figure 1. Representative PCR gel of *trh* false-positive samples. 1: positive  
16 control NZRM 4289; 2-14: *trh* false- positive samples, MW: molecular weight (1kb plus  
17 DNA ladder, Invitrogen).

18
